# Supplementary material for: Aging enhances liver fibrotic response in mice through hampering extracellular matrix remodeling
Source: PubMed Central journal article supplement (PMC5310658; doi:10.18632/aging.101124), 2016-12-09
Supplement: aging-09-0098-s001.pdf [file aging-09-0098-s001.pdf]

SUPPLEMENTARY MATERIAL

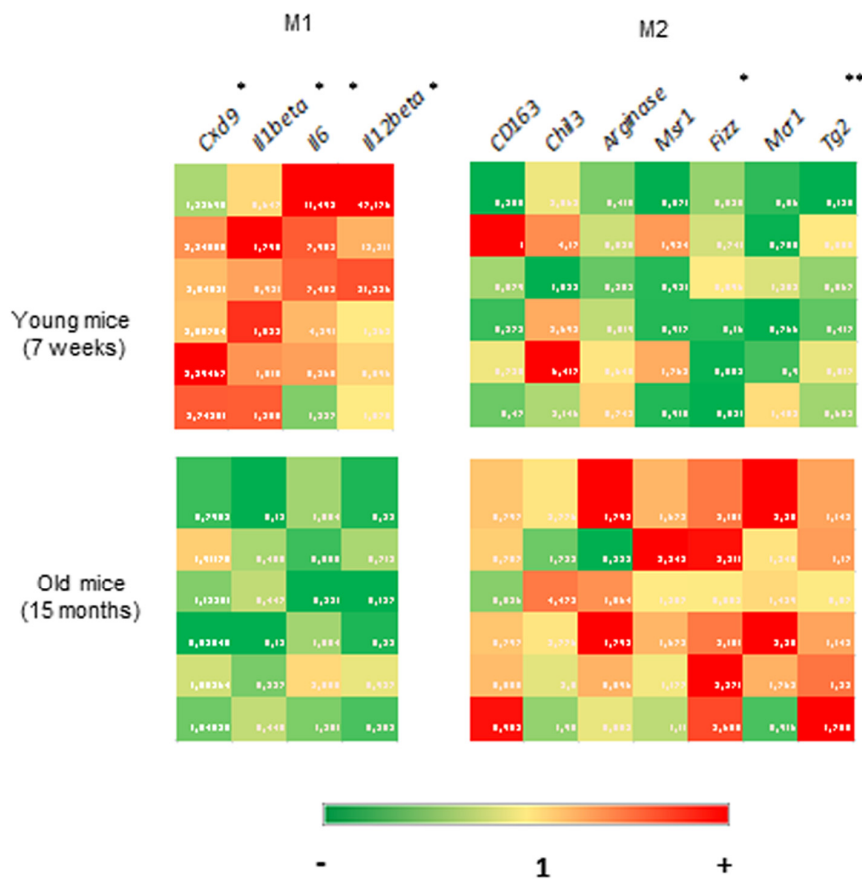

**Supplementary Figure 1. Hepatic genes expression of M1 and M2 markers in young and old mice at peak of fibrosis.** Induction compared to untreated liver appears in red and repression in green. Statistical analysis was performed by two-way ANOVA for repeated measures followed by Bonferroni's post-hoc correction. \*P<0.05; \*\*P<0.01 for differences between age groups.

**Supplementary Table 1. Sequences of quantitative RT-PCR primers.**

| Genes      | Forward sequence primer   | Reverse sequence primer     |
|------------|---------------------------|-----------------------------|
| Collagen I | TTCACCTACAGCACGCTTGT      | TCTTGGTGGTTTTGTATTTCGATGA   |
| alpha Sma  | TCCTGACGCTGAAGTATCCGATA   | GGTGCCAGATCTTTTCCATGTC      |
| Tgf beta   | CCTGCAAGA CCATCGACATG     | GAGCCTTAGTTTTGGACAGGATCTG   |
| Mmp2       | GGACCCCGGTTTCCCTAA        | CAGGTTATCAGGGATGGCATTG      |
| Mmp3       | TGGAGCTTCTGCAGAAATA       | ATCTTTTGAAGGCCATAG          |
| Mmp8       | GTCCCAAGTGGACACACACT      | TCACTTCAGCCCTTGACAGC        |
| Mmp9       | TGAATCATAGAGGAAGCCATTACA  | CGGAGTCCAGCGTTGCA           |
| Mmp13      | CCAGAACTTCCCAACCATGT      | GTCTTCCCCGTGTTCTCAAA        |
| Mmp14      | AGTCAGGGTCACCCACAAAGA     | TTTGGGCTTATCTGGGACAGA       |
| Timp1      | CGCCTACACCCAGTCATG        | TGCGGTTCTGGGACTTGTG         |
| Timp2      | CATTACCCTCTGTGACTTCATGTG  | CTGTGGTTCAGGCTCTTCTTCTG     |
| Cxcl9      | TCTTGGGCATCATCTTCCTGG     | GAGGTCTTTGAGGGATTTGTAGTGG   |
| CD11b      | GGGTCATTGCTACGTAATTGG     | TGTTACCAGCTGGCTTAGATG       |
| Ccl2       | CCACTCACCTGC TGCTACTCAT   | CTGCTGGT GATCCTCTTGT        |
| F4/80      | GATGAATTCCCGTGTGTTGGT     | ACATCAGTGTCCAGGAGACACA      |
| Vegf       | TTACTGCTGTACCTCCACC       | ACAGGACGGCTTGAAGATG         |
| Mif        | GCCAGAGGGGTTTCTGTGC       | GTTTCGTGCCGCTAAAAGTCA       |
| Cx3cr1     | ATCAGCATCGACCGGTACCT      | CTGCACTGTCCGGTTGTTTCA       |
| Il12beta   | AGTGACATGTGGAATGGCGT      | CAGTTCAATGGGCAGGGTCT        |
| Il10       | GATGCCCCAGGCAGAGAA        | CACCCAGGGAATTCAAATGC        |
| Il1beta    | AGTTGACGGACCCCAAAAGA      | GGACAGCCCAGGTCAAAGG         |
| Il6        | CTGCAA GAGACTTCCATCCAGTT  | GAAG TAGGGAAGGC CGTGG       |
| CD163      | CAGGTGTTATCTGCTCCGAGTTC   | CCATGTACCATTGTAACACTTCAA    |
| Chil3      | CATTGGAGGATGGAAGTTTGG     | GAATATCTGACGGTTCTGAGGAGTAGA |
| Arginase   | TGGGTGGATGCTCACACTGA      | CAGGTTGCCCATGCAGATT         |
| Msr1       | GAGGATGCTGACTGCAGTTCAG    | GGGCCATTTTTAGTGCTGTGA       |
| Mcr1       | GCATGGGTTTTACTGCTACTTGATT | CAGGAATGCTTGTTTATATCTGTCTT  |
| Fizz       | ACTGCCTGTGCTTACTCGTTGA    | TCCACCTCTTATTCTTAGGACAGTT   |
| Tg2        | CCACGACCAGAACAGCAACC      | GTATGTCCCTTCGCTCTTCTCC      |
| Lox        | CTACATCCAGGCTTCCAGG       | GCGGAAATCGTAGCAGTA          |
| Lox12      | GCTATGTAGAGGCCAAGTCTG     | CAGTGACACCCAGCCATTG         |
| Adams2     | CAGCCGCTACCTGCATTCTATGA   | CAGGCGCACACATAGTACCATCCA    |
